# Supplementary material for: Levels of Phthalates, Bisphenol-A, Nonylphenol, and Microplastics in Fish in the Estuaries of Northern Taiwan and the Impact on Human Health
Source: MDPI journal article supplement (doi:10.3390/toxics9100246), 2021-10-01
Supplement: s1 [file s1]

# Supplementary Materials: Levels of Phthalates, Bisphenol-A, Nonylphenol, and Microplastics in Fish in the Estuaries of Northern Taiwan and the Impact on Human Health

I-Cheng Lu, How-Ran Chao, Wan-Nurdiyana-Wan Mansor, Chun-Wei Peng, Yi-Chyun Hsu, Tai-Yi Yu, Wei-Hsiang Chang and Lung-Ming Fu

**Table S1.** Estuarine fish samples are classified as benthic, pelagic, and migratory fish.

| Habits    | scientific name                       |
|-----------|---------------------------------------|
| Benthic   | 1. <i>Atule mate</i>                  |
|           | 2. <i>Argyrosomus japonicas</i>       |
|           | 3. <i>Arius maculatus</i>             |
|           | 4. <i>Bothus mancus</i>               |
|           | 5. <i>Calappidae</i>                  |
|           | 6. <i>Chelon macrolepis</i>           |
|           | 7. <i>Chrysochir aureus</i>           |
|           | 8. <i>Dasyatidae</i>                  |
|           | 9. <i>Gerres decacanthus</i>          |
|           | 10. <i>Lagocephalus gloveri</i>       |
|           | 11. <i>Leiognathus equulus</i>        |
|           | 12. <i>Miichthys miiuy</i>            |
|           | 13. <i>Pennahia microcephalus</i>     |
|           | 14. <i>Portunidae</i>                 |
|           | 15. <i>Portunus trituberculatus</i>   |
|           | 16. <i>Scomberoides lysan</i>         |
|           | 17. <i>Secutor indicus</i>            |
|           | 18. <i>Sillago asiatica</i>           |
|           | 19. <i>Synodus fuscus</i>             |
|           | 20. <i>Terapon jarbua</i>             |
| Pelagic   | 21. <i>Atropus Atropos</i>            |
|           | 22. <i>Nibea albiflora</i>            |
|           | 23. <i>Pampus argenteus</i>           |
|           | 24. <i>Prionace glauca</i>            |
| Migratory | 25. <i>Megalaspis cordyla</i>         |
|           | 26. <i>Moolgarda cunnesius</i>        |
|           | 27. <i>Mugil cephalus</i>             |
|           | 28. <i>Nematelosa nasus</i>           |
|           | 29. <i>Parapristipoma trilineatum</i> |

**Table S2.** Eigenvalues and explained variances of the rotated principal components (RPCs) of EEDCs in the estuarine fish.

| component | Initial Eigenvalues |               |              | Extraction Sums of the Squared Loadings |               |              | Rotation Sums of the Squared Loadings |
|-----------|---------------------|---------------|--------------|-----------------------------------------|---------------|--------------|---------------------------------------|
|           | Total               | % of Variance | Cumulative % | Total                                   | % of Variance | Cumulative % | Total                                 |
| 1         | 1.710               | 28.507        | 28.507       | 1.710                                   | 28.507        | 28.507       | 1.582                                 |
| 2         | 1.217               | 20.279        | 48.786       | 1.217                                   | 48.786        | 48.786       | 1.250                                 |

| 3                        | 1.075 | 17.917 | 66.703 | 1.075     | 66.703 | 66.703 | 1.171 |
|--------------------------|-------|--------|--------|-----------|--------|--------|-------|
| Rotated Component Matrix |       |        |        |           |        |        |       |
|                          |       |        |        | Component |        |        |       |
|                          |       |        |        | 1         | 2      | 3      |       |
|                          | DBP   |        |        | .868      | .122   | .088   |       |
|                          | DIBP  |        |        | .844      | -.024  | .045   |       |
|                          | DEP   |        |        | .287      | .732   | -.049  |       |
|                          | MPs   |        |        | -.147     | .832   | .038   |       |
|                          | NP    |        |        | -.002     | -.059  | .772   |       |
|                          | BPA   |        |        | .113      | .055   | .750   |       |

**Table S3.** Compilation of assessments of human health based on estimates of consumption of estuarine fishes contaminated from the northern rivers of Taiwan in male populations.

| Male age |    | DEHP                  | DEP                   | DBP                   | DIBP                  | DINP                  | BPA                   | NP                    | DMP                   | MP                    |
|----------|----|-----------------------|-----------------------|-----------------------|-----------------------|-----------------------|-----------------------|-----------------------|-----------------------|-----------------------|
| 0–3      | DI | 3.03×10 <sup>-5</sup> | 7.06×10 <sup>-5</sup> | 1.81×10 <sup>-5</sup> | 2.67×10 <sup>-5</sup> | 5.57×10 <sup>-5</sup> | 7.98×10 <sup>-7</sup> | 2.35×10 <sup>-5</sup> | 3.93×10 <sup>-6</sup> | 2.52×10 <sup>-7</sup> |
|          | HQ | 5.83×10 <sup>-5</sup> | 3.42×10 <sup>-6</sup> | 7.04×10 <sup>-6</sup> | 1.03×10 <sup>-5</sup> | 3.63×10 <sup>-5</sup> | 6.19×10 <sup>-7</sup> | 1.84×10 <sup>-4</sup> | —                     | —                     |
|          | R  | 1.63×10 <sup>-8</sup> | —                     | —                     | —                     | —                     | —                     | —                     | —                     | —                     |
| 3–6      | DI | 4.27×10 <sup>-5</sup> | 9.98×10 <sup>-5</sup> | 2.55×10 <sup>-5</sup> | 3.75×10 <sup>-5</sup> | 7.88×10 <sup>-5</sup> | 1.13×10 <sup>-6</sup> | 3.31×10 <sup>-5</sup> | 5.54×10 <sup>-6</sup> | 3.56×10 <sup>-7</sup> |
|          | HQ | 8.22×10 <sup>-5</sup> | 4.83×10 <sup>-6</sup> | 9.93×10 <sup>-6</sup> | 1.45×10 <sup>-5</sup> | 5.13×10 <sup>-5</sup> | 8.73×10 <sup>-7</sup> | 2.59×10 <sup>-4</sup> | —                     | —                     |
|          | R  | 2.30×10 <sup>-8</sup> | —                     | —                     | —                     | —                     | —                     | —                     | —                     | —                     |
| 6–12     | DI | 2.10×10 <sup>-5</sup> | 4.91×10 <sup>-5</sup> | 1.26×10 <sup>-5</sup> | 1.85×10 <sup>-5</sup> | 3.88×10 <sup>-5</sup> | 5.54×10 <sup>-7</sup> | 1.63×10 <sup>-5</sup> | 2.73×10 <sup>-6</sup> | 1.75×10 <sup>-7</sup> |
|          | HQ | 8.09×10 <sup>-5</sup> | 4.75×10 <sup>-6</sup> | 9.78×10 <sup>-6</sup> | 1.43×10 <sup>-5</sup> | 5.05×10 <sup>-5</sup> | 8.59×10 <sup>-7</sup> | 2.55×10 <sup>-4</sup> | —                     | —                     |
|          | R  | 2.27×10 <sup>-8</sup> | —                     | —                     | —                     | —                     | —                     | —                     | —                     | —                     |
| 12–16    | DI | 1.88×10 <sup>-5</sup> | 4.39×10 <sup>-5</sup> | 1.12×10 <sup>-5</sup> | 1.65×10 <sup>-5</sup> | 3.48×10 <sup>-5</sup> | 4.94×10 <sup>-7</sup> | 1.45×10 <sup>-5</sup> | 2.43×10 <sup>-6</sup> | 1.56×10 <sup>-7</sup> |
|          | HQ | 4.81×10 <sup>-5</sup> | 2.83×10 <sup>-6</sup> | 5.82×10 <sup>-6</sup> | 8.48×10 <sup>-6</sup> | 3.00×10 <sup>-5</sup> | 5.11×10 <sup>-7</sup> | 1.52×10 <sup>-4</sup> | —                     | —                     |
|          | R  | 1.35×10 <sup>-8</sup> | —                     | —                     | —                     | —                     | —                     | —                     | —                     | —                     |
| 16–18    | DI | 2.56×10 <sup>-5</sup> | 2.89×10 <sup>-5</sup> | 1.53×10 <sup>-5</sup> | 2.25×10 <sup>-5</sup> | 4.75×10 <sup>-5</sup> | 6.74×10 <sup>-7</sup> | 1.98×10 <sup>-5</sup> | 3.32×10 <sup>-6</sup> | 2.13×10 <sup>-7</sup> |
|          | HQ | 3.28×10 <sup>-5</sup> | 9.29×10 <sup>-7</sup> | 3.97×10 <sup>-6</sup> | 5.78×10 <sup>-6</sup> | 2.05×10 <sup>-5</sup> | 3.49×10 <sup>-7</sup> | 1.04×10 <sup>-4</sup> | —                     | —                     |
|          | R  | 9.19×10 <sup>-9</sup> | —                     | —                     | —                     | —                     | —                     | —                     | —                     | —                     |
| 19–65    | DI | 2.15×10 <sup>-5</sup> | 5.04×10 <sup>-5</sup> | 1.29×10 <sup>-5</sup> | 1.89×10 <sup>-5</sup> | 4.00×10 <sup>-5</sup> | 5.62×10 <sup>-7</sup> | 1.67×10 <sup>-5</sup> | 2.79×10 <sup>-6</sup> | 1.79×10 <sup>-7</sup> |
|          | HQ | 6.35×10 <sup>-4</sup> | 3.73×10 <sup>-5</sup> | 7.68×10 <sup>-5</sup> | 1.12×10 <sup>-4</sup> | 3.96×10 <sup>-4</sup> | 6.74×10 <sup>-6</sup> | 2.00×10 <sup>-3</sup> | —                     | —                     |
|          | R  | 1.78×10 <sup>-7</sup> | —                     | —                     | —                     | —                     | —                     | —                     | —                     | —                     |
| >65      | DI | 2.63×10 <sup>-5</sup> | 6.12×10 <sup>-5</sup> | 1.57×10 <sup>-5</sup> | 2.31×10 <sup>-5</sup> | 4.88×10 <sup>-5</sup> | 6.98×10 <sup>-7</sup> | 2.04×10 <sup>-5</sup> | 3.40×10 <sup>-6</sup> | 2.19×10 <sup>-7</sup> |
|          | HQ | 2.19×10 <sup>-4</sup> | 1.29×10 <sup>-5</sup> | 2.65×10 <sup>-5</sup> | 3.86×10 <sup>-5</sup> | 1.37×10 <sup>-4</sup> | 2.33×10 <sup>-6</sup> | 6.92×10 <sup>-4</sup> | —                     | —                     |
|          | R  | 6.14×10 <sup>-8</sup> | —                     | —                     | —                     | —                     | —                     | —                     | —                     | —                     |

**Table S4.** Compilation of assessments of human health based on estimates of consumption of estuarine fishes contaminated from the northern rivers of Taiwan in female populations.

| Ages  |    | DEHP                  | DEP                   | DBP                   | DIBP                  | DINP                  | BPA                   | NP                    | DMP                   | MP                    |
|-------|----|-----------------------|-----------------------|-----------------------|-----------------------|-----------------------|-----------------------|-----------------------|-----------------------|-----------------------|
| 0–3   | DI | 2.71×10 <sup>-5</sup> | 6.23×10 <sup>-5</sup> | 1.60×10 <sup>-5</sup> | 2.35×10 <sup>-5</sup> | 4.97×10 <sup>-5</sup> | 7.11×10 <sup>-7</sup> | 2.07×10 <sup>-5</sup> | 3.46×10 <sup>-6</sup> | 2.23×10 <sup>-7</sup> |
|       | HQ | 4.69×10 <sup>-5</sup> | 2.79×10 <sup>-6</sup> | 5.75×10 <sup>-6</sup> | 8.38×10 <sup>-6</sup> | 2.97×10 <sup>-5</sup> | 5.05×10 <sup>-7</sup> | 1.50×10 <sup>-4</sup> | —                     | —                     |
|       | R  | 1.31×10 <sup>-8</sup> | —                     | —                     | —                     | —                     | —                     | —                     | —                     | —                     |
| 3–6   | DI | 3.75×10 <sup>-5</sup> | 8.60×10 <sup>-5</sup> | 2.21×10 <sup>-5</sup> | 3.24×10 <sup>-5</sup> | 6.85×10 <sup>-5</sup> | 9.65×10 <sup>-7</sup> | 2.86×10 <sup>-5</sup> | 4.78×10 <sup>-6</sup> | 3.08×10 <sup>-7</sup> |
|       | HQ | 6.47×10 <sup>-5</sup> | 3.85×10 <sup>-6</sup> | 7.93×10 <sup>-6</sup> | 1.16×10 <sup>-5</sup> | 4.09×10 <sup>-5</sup> | 6.97×10 <sup>-7</sup> | 2.07×10 <sup>-4</sup> | —                     | —                     |
|       | R  | 1.81×10 <sup>-8</sup> | —                     | —                     | —                     | —                     | —                     | —                     | —                     | —                     |
| 6–12  | DI | 2.44×10 <sup>-5</sup> | 5.68×10 <sup>-5</sup> | 1.46×10 <sup>-5</sup> | 2.13×10 <sup>-5</sup> | 4.50×10 <sup>-5</sup> | 6.35×10 <sup>-7</sup> | 1.88×10 <sup>-5</sup> | 3.14×10 <sup>-6</sup> | 2.02×10 <sup>-7</sup> |
|       | HQ | 8.50×10 <sup>-5</sup> | 5.07×10 <sup>-6</sup> | 1.04×10 <sup>-5</sup> | 1.52×10 <sup>-5</sup> | 5.38×10 <sup>-5</sup> | 9.16×10 <sup>-7</sup> | 2.72×10 <sup>-4</sup> | —                     | —                     |
|       | R  | 2.38×10 <sup>-8</sup> | —                     | —                     | —                     | —                     | —                     | —                     | —                     | —                     |
| 12–16 | DI | 1.80×10 <sup>-5</sup> | 4.16×10 <sup>-5</sup> | 1.07×10 <sup>-5</sup> | 1.56×10 <sup>-5</sup> | 3.30×10 <sup>-5</sup> | 4.64×10 <sup>-7</sup> | 1.38×10 <sup>-5</sup> | 2.30×10 <sup>-6</sup> | 1.48×10 <sup>-7</sup> |
|       | HQ | 4.15×10 <sup>-5</sup> | 2.47×10 <sup>-6</sup> | 5.09×10 <sup>-6</sup> | 7.42×10 <sup>-6</sup> | 2.63×10 <sup>-5</sup> | 4.47×10 <sup>-7</sup> | 1.33×10 <sup>-4</sup> | —                     | —                     |
|       | R  | 1.16×10 <sup>-8</sup> | —                     | —                     | —                     | —                     | —                     | —                     | —                     | —                     |
| 16–18 | DI | 2.18×10 <sup>-5</sup> | 2.60×10 <sup>-5</sup> | 1.31×10 <sup>-5</sup> | 1.91×10 <sup>-5</sup> | 4.03×10 <sup>-5</sup> | 5.70×10 <sup>-7</sup> | 1.69×10 <sup>-5</sup> | 2.83×10 <sup>-6</sup> | 1.82×10 <sup>-7</sup> |
|       | HQ | 2.55×10 <sup>-5</sup> | 7.74×10 <sup>-7</sup> | 3.12×10 <sup>-6</sup> | 4.55×10 <sup>-6</sup> | 1.61×10 <sup>-5</sup> | 2.74×10 <sup>-7</sup> | 8.16×10 <sup>-5</sup> | —                     | —                     |
|       | R  | 7.13×10 <sup>-9</sup> | —                     | —                     | —                     | —                     | —                     | —                     | —                     | —                     |
| 19–65 | DI | 2.02×10 <sup>-5</sup> | 4.69×10 <sup>-5</sup> | 1.20×10 <sup>-5</sup> | 1.76×10 <sup>-5</sup> | 3.71×10 <sup>-5</sup> | 5.28×10 <sup>-7</sup> | 1.56×10 <sup>-5</sup> | 2.62×10 <sup>-6</sup> | 1.67×10 <sup>-7</sup> |
|       | HQ | 5.39×10 <sup>-4</sup> | 3.21×10 <sup>-5</sup> | 6.61×10 <sup>-5</sup> | 9.64×10 <sup>-5</sup> | 3.41×10 <sup>-4</sup> | 5.81×10 <sup>-6</sup> | 1.73×10 <sup>-3</sup> | —                     | —                     |
|       | R  | 1.51×10 <sup>-7</sup> | —                     | —                     | —                     | —                     | —                     | —                     | —                     | —                     |
| >65   | DI | 2.26×10 <sup>-5</sup> | 5.14×10 <sup>-5</sup> | 1.32×10 <sup>-5</sup> | 1.93×10 <sup>-5</sup> | 4.06×10 <sup>-5</sup> | 5.79×10 <sup>-7</sup> | 1.71×10 <sup>-5</sup> | 2.88×10 <sup>-6</sup> | 1.83×10 <sup>-7</sup> |
|       | HQ | 2.44×10 <sup>-4</sup> | 1.45×10 <sup>-5</sup> | 2.99×10 <sup>-5</sup> | 4.36×10 <sup>-5</sup> | 1.54×10 <sup>-4</sup> | 2.63×10 <sup>-6</sup> | 7.82×10 <sup>-4</sup> | —                     | —                     |
|       | R  | 6.83×10 <sup>-8</sup> | —                     | —                     | —                     | —                     | —                     | —                     | —                     | —                     |
